# Supplementary material for: Ru(ii) sensitized lanthanide luminescence: synthesis, photophysical properties, and near-infrared luminescent determination of alpha-fetal protein (AFP)
Source: Royal Society of Chemistry journal article supplement (doi:10.1039/c2dt30974b), 2012-01-01
Supplement: c2dt30974b.pdf [file c2dt30974b.pdf]

## Supporting Information

### **Ru (II) Sensitized Lanthanide Luminescence: Synthesis, Photophysical Properties, and Near-Infrared Luminescent Determination of Alpha-Fetal Protein (AFP)**

Qiao-Hua Wei\* <sup>a,b</sup>, Yan-Fang Lei <sup>a</sup>, Wen-Ran Xu <sup>a</sup>, Jian-Ming Xie <sup>a</sup> and Guo-Nan Chen\* <sup>a</sup>

*<sup>a</sup>Ministry of Education Key Laboratory of Analysis and Detection Technology for Food Safety,  
Department of Chemistry, Fuzhou University, Fuzhou, Fujian 350002, China*

*<sup>b</sup>State Key Laboratory of Structural Chemistry, Fujian Institute of Research on the Structure of Matter  
and Graduate School of CAS, the Chinese Academy of Sciences, Fuzhou, Fujian 350002, China*

*Received May 00, 2012*

# Solution Behavior of Ru-Ln Complexes: UV-Vis Titrations Spectra, Luminescence Titrations, and Association Constants.

## UV-Vis Titrations Spectra

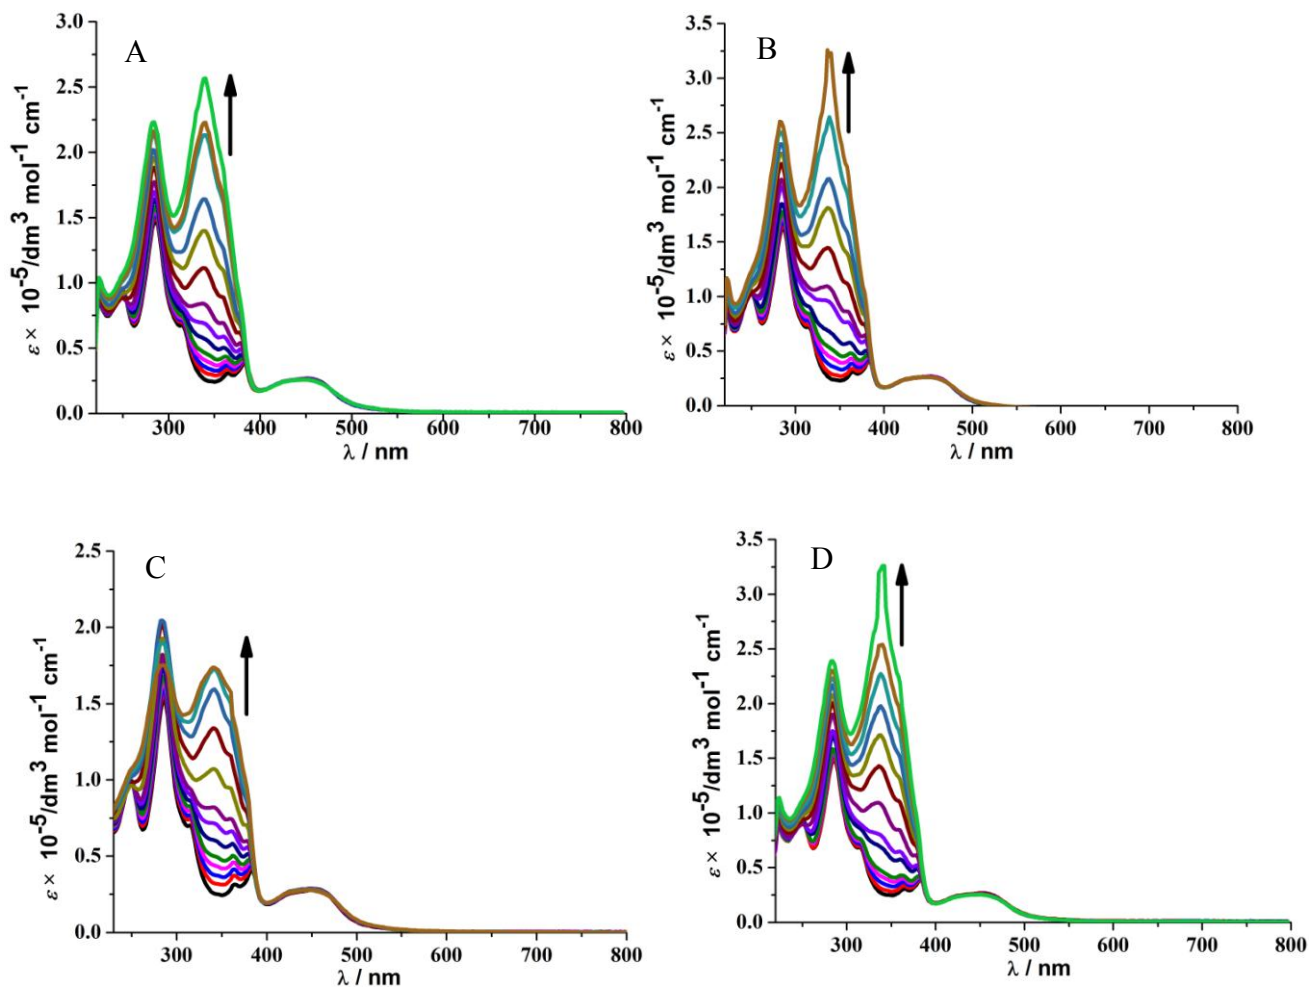

**Fig. S1** Changes in UV-Vis absorption spectra of  $[\text{Ru}(\text{bpy})_2(\text{tpphz})](\text{PF}_6)_2$  in  $\text{CH}_2\text{Cl}_2$  on titration with  $[\text{Ln}(\text{TTA})_3(\text{H}_2\text{O})_2]$  ( $\text{Ln} = \text{Gd (III)}$  (A);  $\text{Er (III)}$  (B);  $\text{Nd (III)}$  (C), and  $\text{Yb (III)}$  (D)).

## Luminescence Titrations

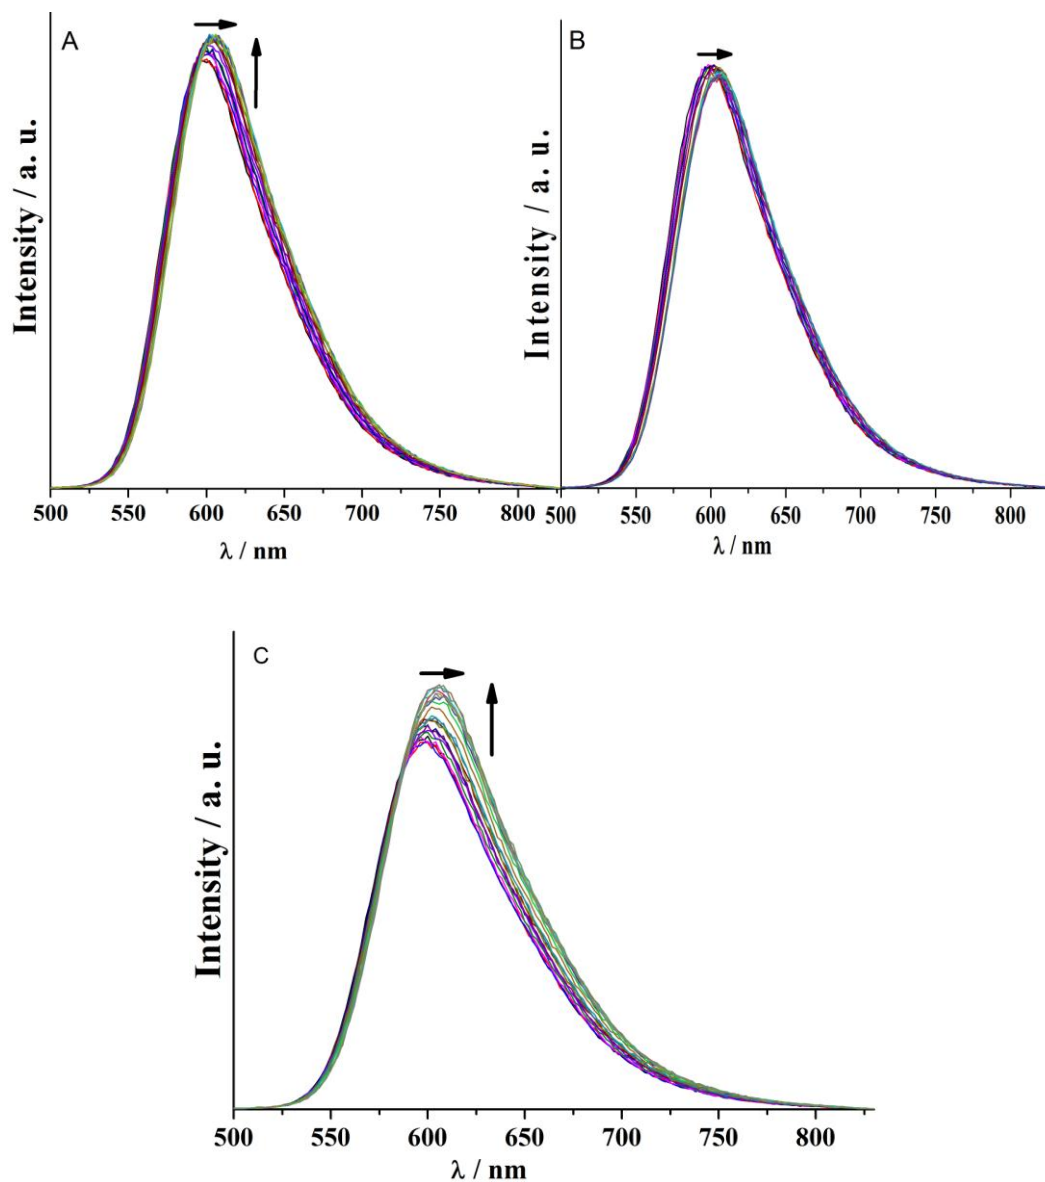

**Fig. S2** Changes in the <sup>3</sup>MLCT luminescence spectra of [Ru(bpy)<sub>2</sub>(tpphz)](PF<sub>6</sub>)<sub>2</sub> in CH<sub>2</sub>Cl<sub>2</sub> on titration with [Ln(TTA)<sub>3</sub>(H<sub>2</sub>O)<sub>2</sub>] (Ln = Gd (III) (A); Er (III) (B); and Yb (III) (C)).

## Photophysical Properties

### UV-Vis Absorption Spectra

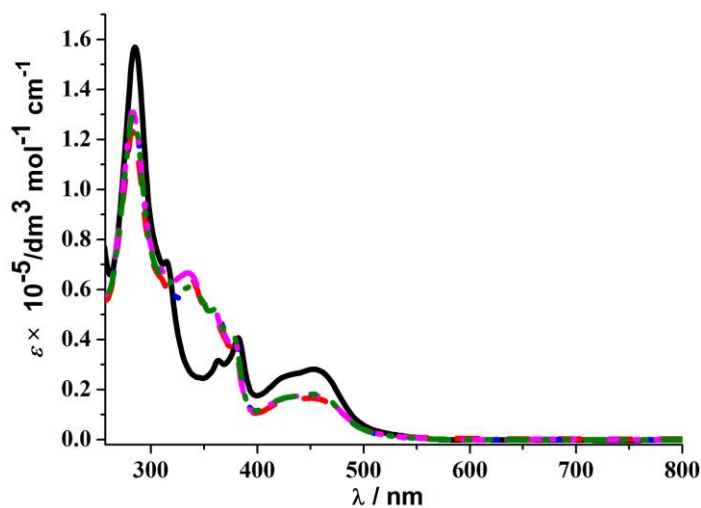

**Fig. S3** UV-Vis absorption spectra of  $[\text{Ru}(\text{bpy})_2(\text{tpphz})](\text{PF}_6)_2$  (black solid), **Ru-Er** (red dash), **Ru-Nd** (blue dot), **Ru-Yb** (magenta dash dot), and **Ru-Gd** (olive dash dot dot) in  $\text{CH}_2\text{Cl}_2$  solution at room temperature. The **Ru-Ln** complexes undergo partial dissociation; therefore, the spectra reflect a mixture of dissociated and undissociated sample.

### <sup>3</sup>MLCT Emission Spectra

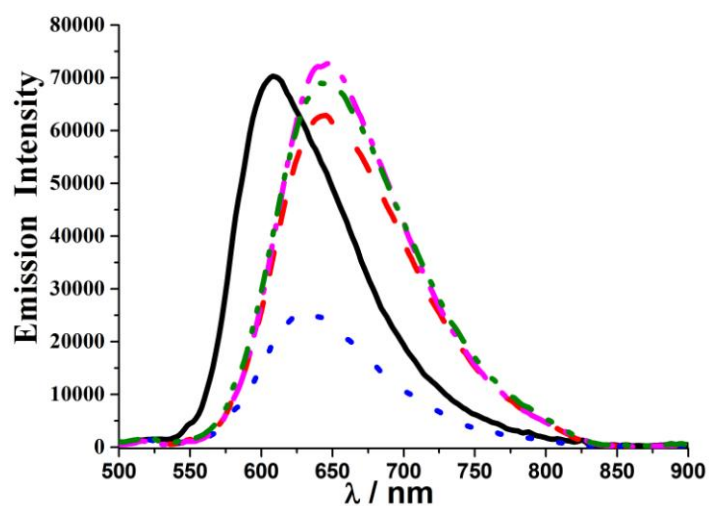

**Fig. S4** The <sup>3</sup>MLCT emission spectra of [Ru(bpy)<sub>2</sub>(tpphz)](PF<sub>6</sub>)<sub>2</sub> (black solid), **Ru-Er** (red dash), **Ru-Nd** (blue dot), **Ru-Yb** (magenta dash dot) and **Ru-Gd** (olive dash dot dot) in solid state at 298K,  $\lambda_{\text{ex}}$  = 468 nm.

### Near-infrared Emission Spectra

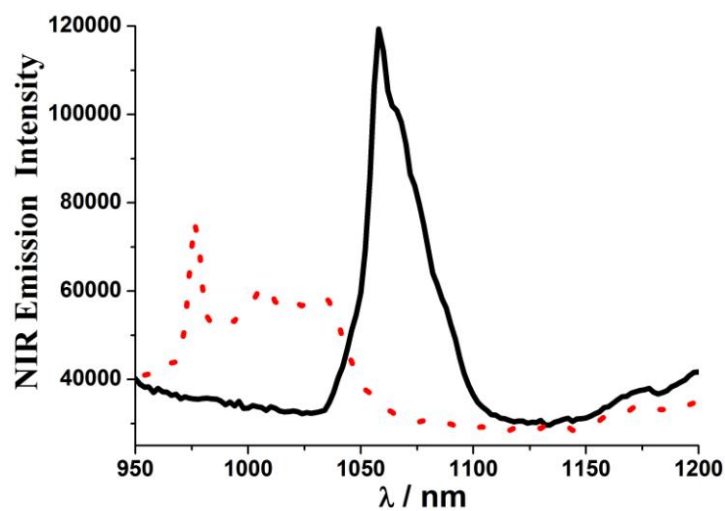

**Fig. S5** The NIR luminescence of **Ru-Nd** (black solid), and **Ru-Yb** (red dot) in  $\text{CH}_2\text{Cl}_2$  solution at 298K,  $\lambda_{\text{ex}} = 468$  nm.

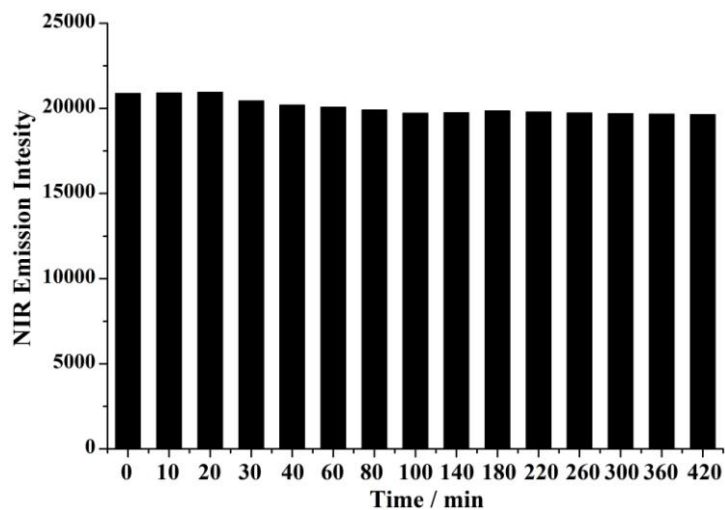

**Fig. S6** The NIR luminescence of **Ru-Nd** complex in Tris-HCl buffer solution (pH 6.8) over 7 hours.
